# Supplementary material for: A Review of the Implementation Status of and National Plans on HPV Vaccination in 17 Middle-Income Countries of the WHO Western Pacific Region
Source: MDPI journal article supplement (doi:10.3390/vaccines9111355), 2021-11-18
Supplement: s1 [file s1]

## Supplementary material

**Table S1.** Characteristics of HPV vaccination demonstration projects, by country

| Countries                 | Year (funding)                     | Target population | Project sites                                                             | Delivery strategy             | Vaccine type         | Dosing schedule                           | Number of target girls | Program coverage |
|---------------------------|------------------------------------|-------------------|---------------------------------------------------------------------------|-------------------------------|----------------------|-------------------------------------------|------------------------|------------------|
| Fiji [32]                 | 2008-09                            | 9-12 yo, girls    | National                                                                  | School                        | Quadrivalent         | 0, 2, 6 m                                 | 30,338                 | 55% (3 doses)    |
| Philippines [34, 35]      | 2011-12 (Jhpigo)                   | 9-13 yo, girls    | 2 provinces (Cebu, Quezon)                                                | Facility                      | Quadrivalent         | 0, 2, 6 m                                 | 4000                   | 88% (3 doses)    |
|                           | 2014 (MoH)                         | -                 | 2 regions (Cordillera, Central Visayas)                                   | Facility                      | -                    | -                                         | -                      | -                |
| Solomon Islands [36]      | 2015-17 (Gavi)                     | 9-12 yo, girls    | 2 provinces (Honiara, Isabel)                                             | School + facility + out reach | Quadrivalent         | 0, 12 m                                   | 8,000                  | -                |
| Lao PDR [37]              | 2013-16 (Gavi)                     | 10 yo, girls      | Capital and 1 province (Vientiane)                                        | School                        | Quadrivalent         | 0, 2, 6 m (2013-14);<br>0, 12 m (2014-16) | -                      | 94-97% (3 doses) |
| China [38, 39]            | 2021- (local government)           | 13-18 yo, girls   | 1 city (Inner Mongolia)                                                   | Facility                      | Bivalent (Cecolin®)  | 0, 6 m                                    | 11,000                 | -                |
|                           | 2020-22 (local government)         | 13-14 yo, girls   | 1 city (Xiamen)                                                           | Facility                      | Bivalent (Cecolin®)  | 0, 6 m                                    | -                      | -                |
| Vietnam [40]              | 2008-10 (PATH/MoH)                 | 11 yo, girls      | 3 districts (Quan Hoa, Nong Cong, Ninh Kieu)                              | School + facility             | Quadrivalent         | 0, 2, 6 m                                 | 3,302                  | 96% (3 doses)    |
|                           |                                    | 11 yo, girls      | 3 districts (Quan Hoa, Nong Cong, Binh Thuy)                              | Facility                      | Quadrivalent         | 0, 2, 6 m                                 | 2,712                  | 99% (3 doses)    |
| Cambodia [41-43]          | 2009-10 (GAP)                      | 11-18 yo, girls   | 1 health facility                                                         | Facility                      | Quadrivalent         | 0, 2, 6 m                                 | 2,000                  | 101%* (3 doses)  |
|                           | 2010-11 (GAP)                      | -                 | 10 sites                                                                  | School + facility             | Quadrivalent         | 0, 2, 6 m                                 | 9600                   | 78% (3 doses)    |
|                           | 2016-17 (Gavi)                     | 9 yo, girls       | 2 provinces (Svay Rieng, Siem Riap)                                       | School + facility             | Bivalent (Cervarix®) | 0, 6 m                                    | 11,646                 | 84% (2 doses)    |
| Mongolia [19, 44]         | 2012 (GAP)                         | 11-17 yo, girls   | 2 districts in capital (Ulaanbaatar) and 2 provinces (Umnungobi, Selenge) | School + facility + out reach | Quadrivalent         | 0, 2, 6 m                                 | 14,063                 | 65% (3 doses)    |
|                           | 2014 (GAP)                         | -                 | -                                                                         | School                        | -                    | -                                         | -                      | -                |
| Papua New Guinea [19, 45] | 2012 (GAP)                         | -                 | -                                                                         | School + facility             | -                    | -                                         | -                      | -                |
|                           | 2017-18 (Rotary)                   | 9-14 yo, girls    | Capital (Port Moresby)                                                    | School                        | Quadrivalent         | 0, 6 m                                    | 28,000                 | -                |
| Vanuatu [46]              | 2008                               | -                 | 1 city (North Efate)                                                      | -                             | -                    | -                                         | -                      | 94% (3 doses)    |
|                           | 2015-16 (Frazer Family Foundation) | 10 yo, girls      | 1 province (Shefa)                                                        | School                        | Bivalent (Cervarix®) | 0, 12 m                                   | 1000                   | 84% (2 doses)    |
| Kiribati [19]             | 2011-13 (GAP/ACCF)                 | -                 | -                                                                         | School                        | -                    | -                                         | -                      | -                |

ACCF: Australian Cervical Cancer Foundation; EPI: Expanded Program on Immunization; GAP: Gardasil® Access Program; m: months; Lao PDR: Lao People's Democratic Republic; MoH: Ministry of Health; yo: year-old

\*Suggested to be due to several factors such as errors in census data and attendance of girls near to but not within the target area

## Supplementary material

**Table S2.** Documented challenges and barriers to introduction and scale-up

| Countries             | Challenges                                                                                                                                                                                                                                                         |
|-----------------------|--------------------------------------------------------------------------------------------------------------------------------------------------------------------------------------------------------------------------------------------------------------------|
| Marshall Islands [29] | <ul style="list-style-type: none"> <li>• Limited awareness about the HPV vaccine especially among parents</li> <li>• Limited involvement of women's groups in promoting vaccination</li> <li>• Need for stronger partnership with other health programs</li> </ul> |
| Malaysia [49]         | <ul style="list-style-type: none"> <li>• Reaching out-of-school girls</li> <li>• Linking HPV vaccination data to women's health program</li> <li>• Emerging anti-vaccine groups</li> </ul>                                                                         |
| Fiji [49]             | <ul style="list-style-type: none"> <li>• Community concerns about vaccine safety</li> <li>• Inadequacy of cold chain</li> <li>• Delays in vaccine delivery and increases in shipping cost</li> <li>• Need for donor assistance to sustain programme</li> </ul>     |
| Lao PDR [37]          | <ul style="list-style-type: none"> <li>• Reaching out-of-school girls</li> </ul>                                                                                                                                                                                   |
| China [50]            | <ul style="list-style-type: none"> <li>• Cost of HPV vaccine</li> <li>• Vaccine supplies</li> <li>• Lack of public awareness</li> <li>• Community concern about vaccine safety and efficacy</li> </ul>                                                             |
| Cambodia [49]         | <ul style="list-style-type: none"> <li>• Identifying and enumerating the target girls</li> <li>• Limited involvement of province and district education departments</li> <li>• Limited health education given to girls before school-based vaccination</li> </ul>  |
| Mongolia [44]         | <ul style="list-style-type: none"> <li>• Community resistance and withdrawal</li> </ul>                                                                                                                                                                            |
| Papua New Guinea [45] | <ul style="list-style-type: none"> <li>• Different interests and priorities among stakeholders</li> <li>• Delays in development of operational plan and guidelines</li> <li>• Restrains in funding</li> <li>• Cold chain requirements</li> </ul>                   |
| Vanuatu [46]          | <ul style="list-style-type: none"> <li>• Vehicle access to schools (tough road and petrol issues)</li> <li>• Tracking of girls for the second dose</li> <li>• Coordination with local government departments and non-governmental organizations</li> </ul>         |

Lao PDR: Lao People's Democratic Republic
